# Supplementary material for: Sympathetic Innervation Modulates Mucosal Immune Homeostasis and Epithelial Host Defense
Source: MDPI journal article supplement (doi:10.3390/cells11162606), 2022-08-21
Supplement: s1 [file s1]

Supplementary Figures

Figure S1

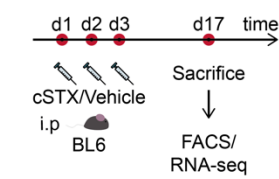

Figure S1: The experimental setup for 6-OHDA and vehicle treatment.

Figure S2

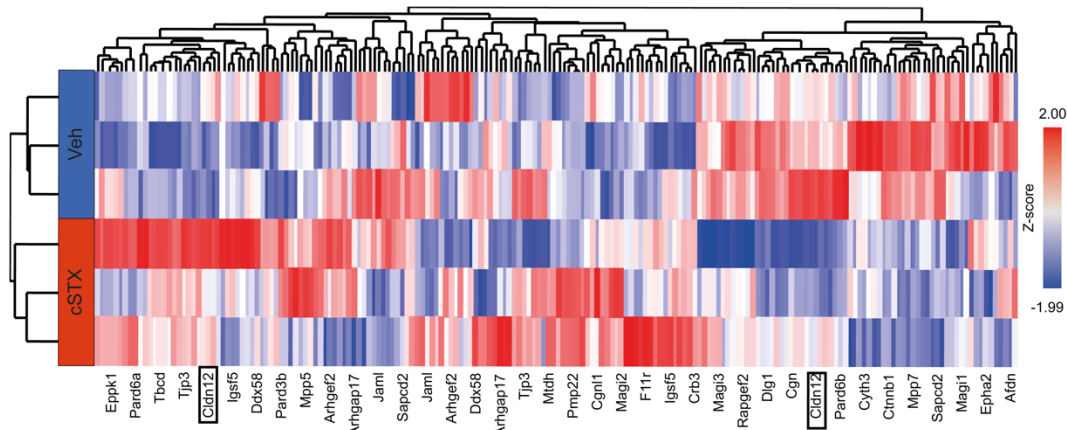

Figure S2: The heatmap analysis showing transcriptional differences in genes related to tight junction in cSTX compared to vehicle- treated mice

Figure S3A

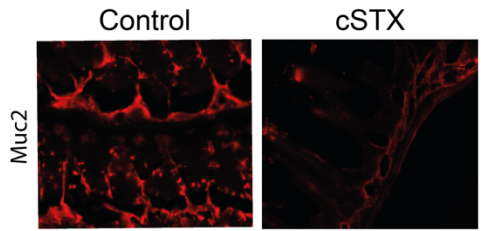

Figure S3B

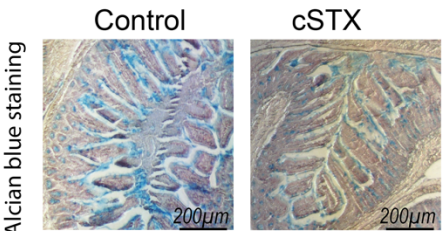

Figure S3A: Diminished Muc2 protein expression in cSTX compared to control mice (A).

Figure S3B: Reduced numbers of alcian blue positive goblet cells in cSTX compared to control mice (B).

Figure S4A

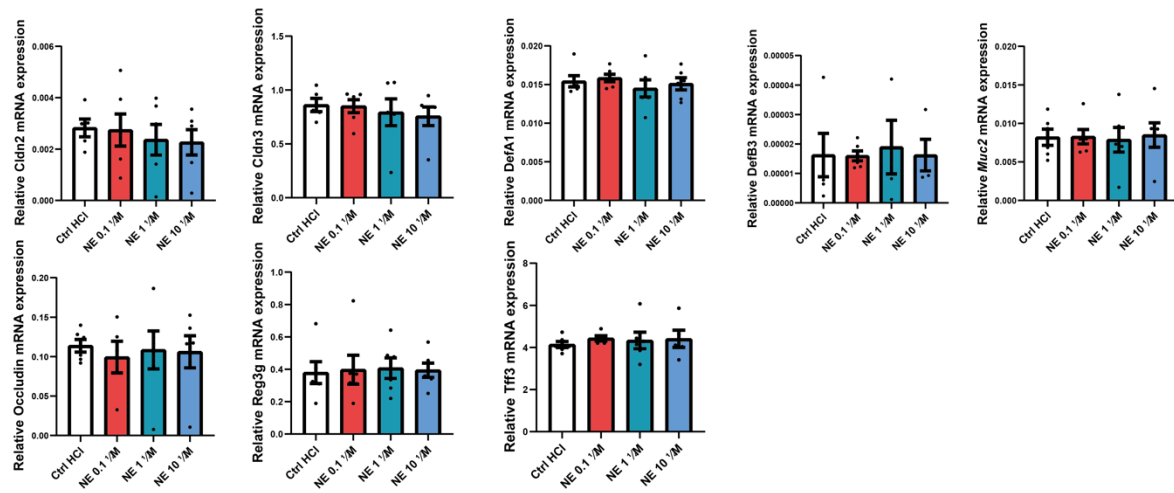

Figure S4A: mRNA levels of Cldn2, Cldn3, Defa1, DefB3, Muc2, Ocln, Reg3g, and Tff3 showing no changes after 72 hours of stimulation with on norepinephrine stimulated organoids, compared with the vehicle-stimulated organoids.

Figure S4B

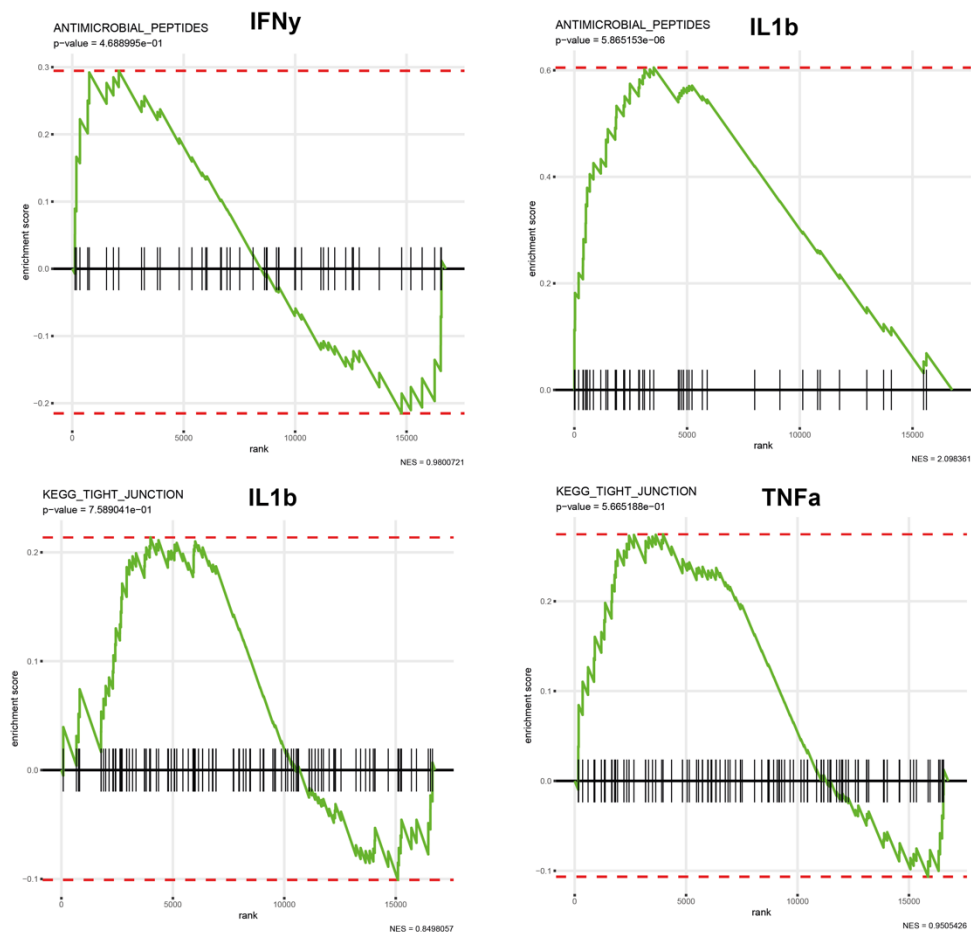

Figure S4B: Gene set enrichment analyses (GSEA) showing enrichment of genes expressing tight junctions following treatment with IFN- $\gamma$ , IL1b and antimicrobial peptides upon treatment with IL1b and TNF- $\alpha$

Table S1: Primer sequences used for qPCR analysis.

|                                     | Forward                   | Reverse                   |
|-------------------------------------|---------------------------|---------------------------|
| <i>Arg1</i>                         | TTGGGTGGATGCTCACACTG      | TTGCCCATGCAGATTCCC        |
| <i>CD163</i>                        | GTGCTGGATCTCCTGGTTGT      | CGTTAGTGACAGCAGAGGCA      |
| <i>IL6</i>                          | AAGTCGGAGGCTTAATTACACATGT | CCATTGCACAACCTCTTTTCTCATT |
| <i>IL1b</i>                         | TTGACGGACCCCAAAAGATG      | CAGGACAGCCCAGGTCAAAG      |
| <i>TNF<math>\alpha</math></i>       | CTGAACCTCGGGGTGATCGG      | GGCTTGTCACCTCGAATTTTGAGA  |
| <i>Muc2</i>                         | TGCCCAGAGAGTTTGGAGAGG     | CCTCACATGTGGTCTGGTTG      |
| <i>TFF3</i>                         | CTCTGTCACATCGGAGCAGTGT    | TGAAGCACCAGGGCACATT       |
| <i>Cldn2</i>                        | CCACAAGCAGGCTCAAGAAG      | TTCGCCTTTCTCTGGACCTA      |
| <i>Cldn3</i>                        | GCAAGCAGACTGTGTGTCGT      | TACCGTCACCACTACCAGCA      |
| <i>Ocln</i>                         | CATAGTCAGATGGGGGTGGA      | ATTTATGATGAACAGCCCCC      |
| <i>Defa1</i>                        | CAGGCCGTATCTGTCTCCTT      | ATGACCCTTTCTGCAGGTTC      |
| <i>Reg3g</i>                        | TTCCTGTCCTCCATGATCAAAA    | CATCCACCTCTGTTGGGTTCA     |
| <i><math>\beta</math>3 defensin</i> | GTTTGCATTTCTCCTGGTGC      | GCCTCCTTTCTCAAACAACCT     |
| <i>Lyz1</i>                         | GAGACCGAAGCACCGACTATG     | CGGTTTTGACATTGTGTTCGC     |
| <i>GAPDH</i>                        | GGGAAGCCCATCACCATCTT      | GCCTCACCCCATTTGATGTT      |
