# Supplementary figures and images for: Sympathetic Innervation Modulates Mucosal Immune Homeostasis and Epithelial Host Defense
Source: MDPI journal article supplement (doi:10.3390/cells11162606), 2022-08-21

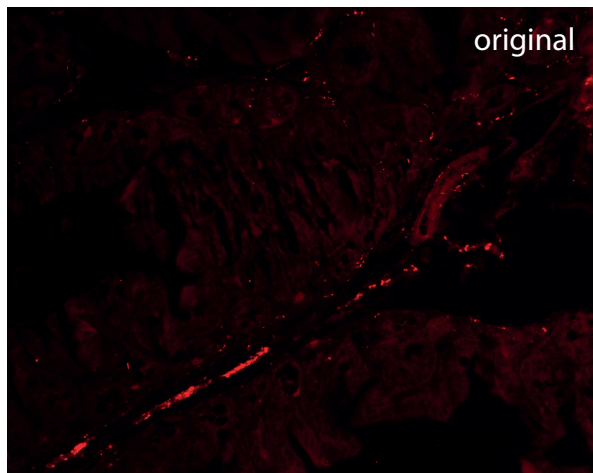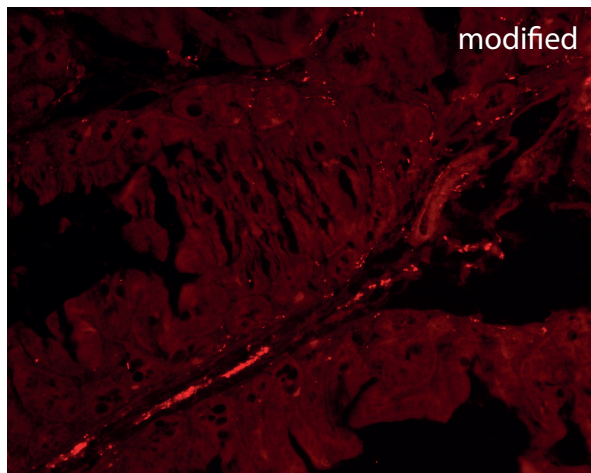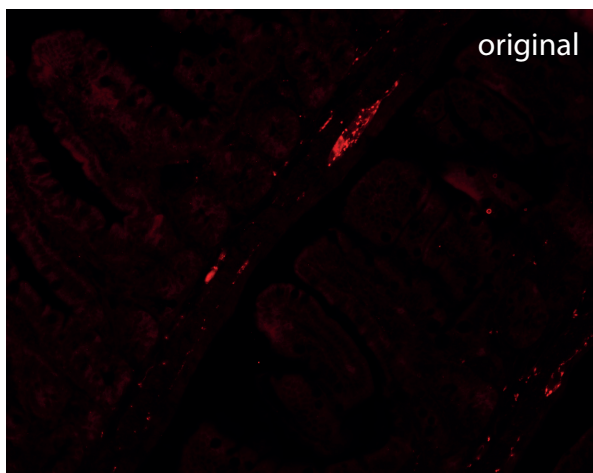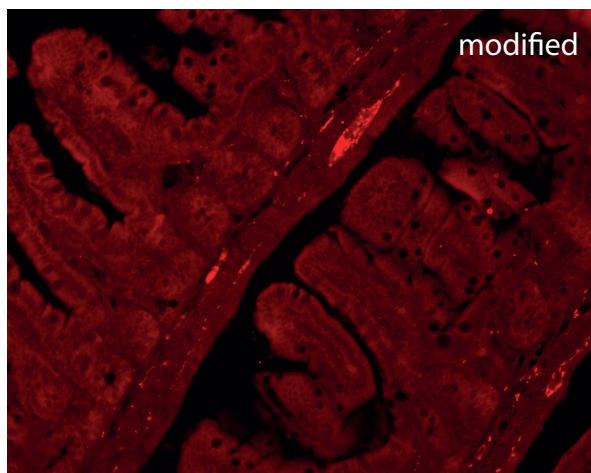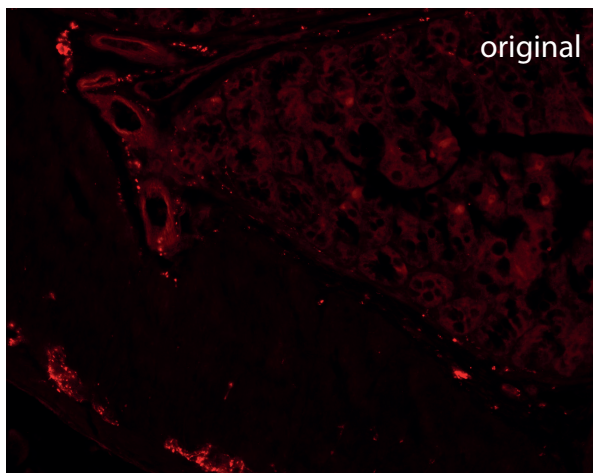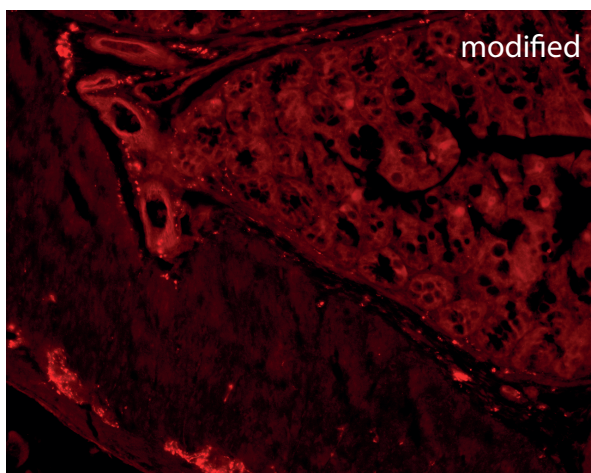

Supplement: s1 [file s1]
